# Supplementary material for: A potential naphthyl-thiazole-based organic dye and a ditopic chromogenic probe for CN− and Fe3+ with molecular logic functions
Source: Royal Society of Chemistry journal article supplement (doi:10.1039/d0nj03806g), 2020-01-01
Supplement: d0nj03806g1.pdf [file d0nj03806g1.pdf]

A potential naphthyl-thiazole-based organic dye and a ditopic chromogenic probe for CN<sup>-</sup> and Fe<sup>3+</sup> with molecular logic functions

Veikko Uahengo\*, Eunike N Hamukwaya, Paulina T Endjala, Johannes H Naimhwaka

Department of Chemistry and Biochemistry, University of Namibia, 340 Mandume Ndemufayo Avenue, Windhoek, 9000, Namibia

\*Corresponding author. Tel: +264 61 206 3465. E-mail address: vuahengo@unam.na or vuahengo@gmail.com (Veikko Uahengo)

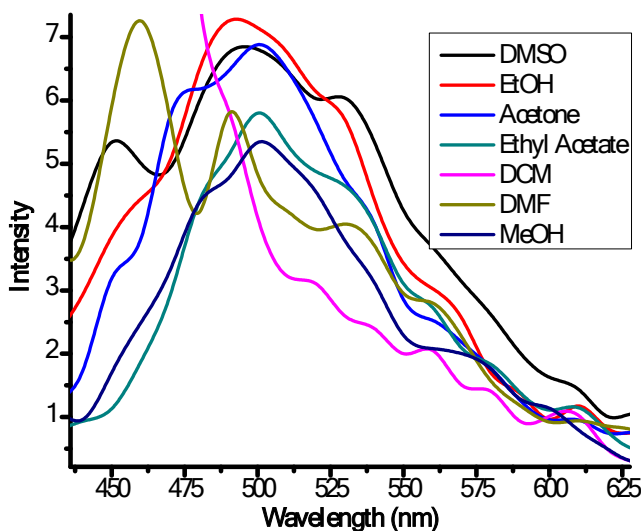

**Figure S1:** Fluorescence spectra of **J** ( $1 \times 10^{-5}$  M) in different solvents, for solvatochromism ( $400 \text{ nm}_{\text{ex}}$ ), at room temperature

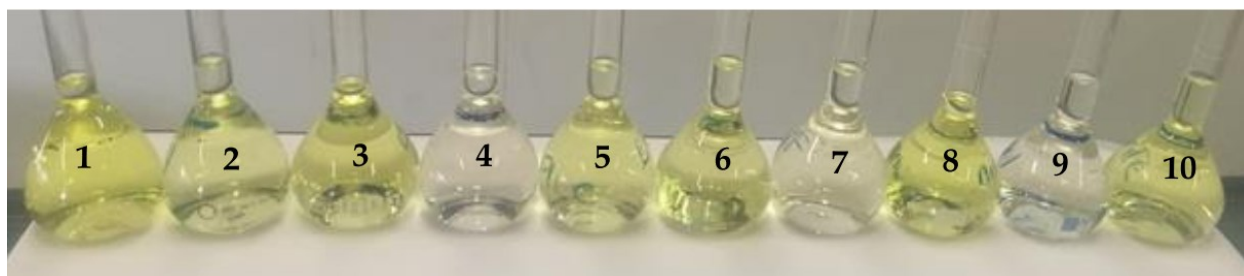

**Figure S2:** Photographic pictures of **J** in different solvents: (1) EtOH, (2) MeOH, (3) Chloroform, (4) DMF, (5) Ethyl acetate, (6) DMSO, (7) THF, (8) DCM, (9) Isopropyl Alcohol, (10) CH<sub>3</sub>CN, all at room temperature

$$E_g \text{ (eV)} = h\nu = hc/\lambda \text{ ----- (1)}$$

Or

$$E_{\text{H-L}} \text{ (eV)} = 1240/\lambda \text{ (nm)} \text{ ----- (2)}$$

**Figure S3:** Equations to estimate the HOMO-LUMO gap

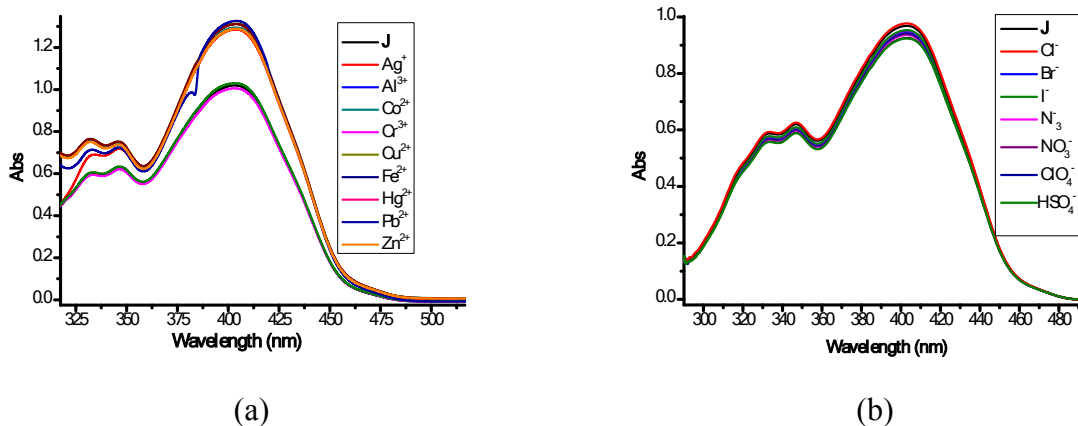

**Figure S4:** UV-vis changes of **J** ( $1 \times 10^{-5}$  M) in CH<sub>3</sub>CN of all other (a) cations and (b) anions (5 equiv.), combined in one graph

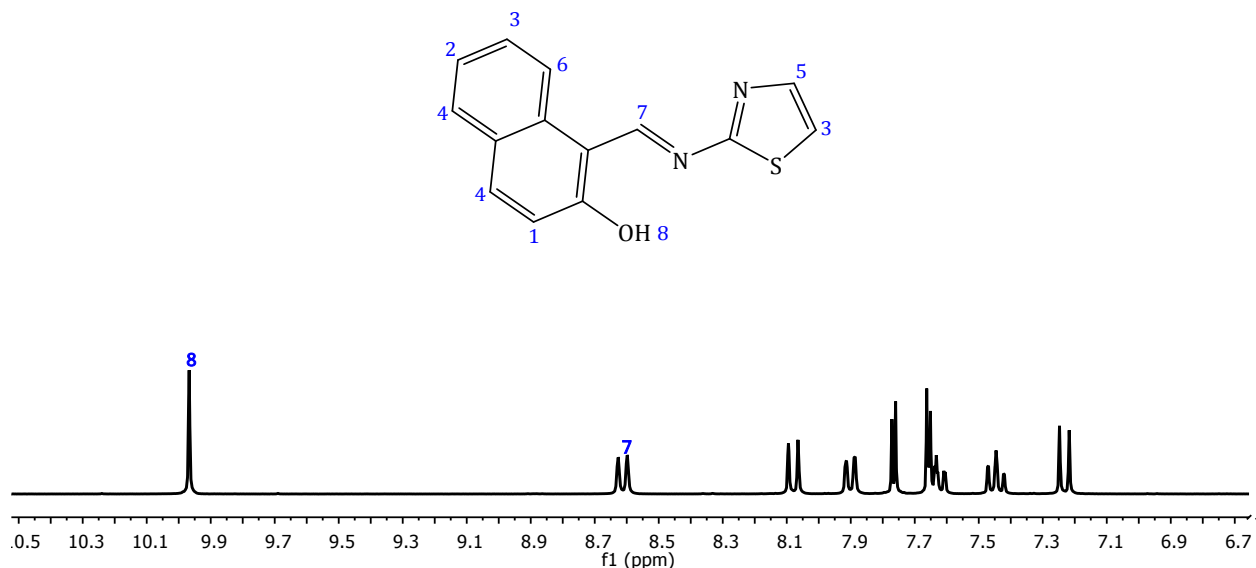

**Figure S5:** The plot of <sup>1</sup>H NMR titration spectra for **J** ( $1 \times 10^{-2}$  M) in DMSO-d<sub>6</sub> at 25°C

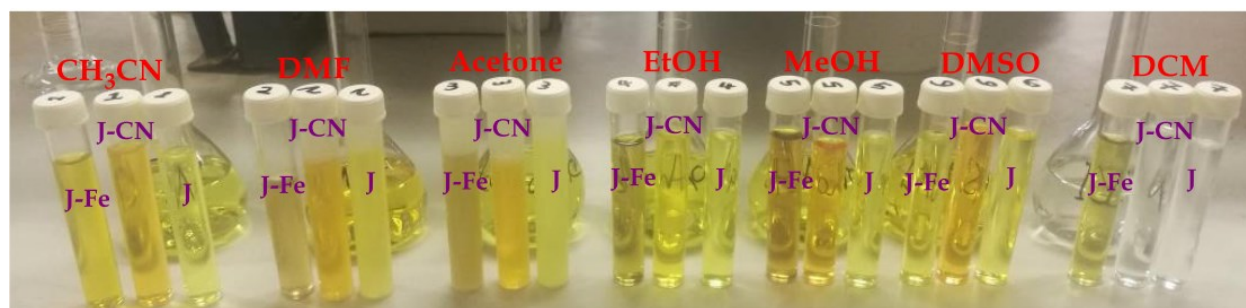

(a)

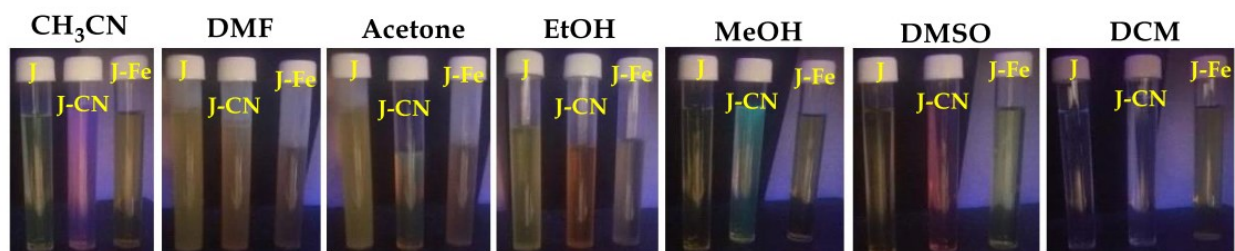

(b)

**Figure S5:** Comparisons of photographic pictures of **J** ( $1 \times 10^{-5}$  M) displaying colour changes upon equimolar (5 equiv.) of CN<sup>-</sup> and Fe<sup>3+</sup> respectively, under (a) daylight and (b) UV-light conditions, displayed in different solvents
